# Supplementary material for: MARCKSL1 promotes the proliferation, migration and invasion of lung adenocarcinoma cells
Source: PubMed Central journal article supplement — Oncol Lett. 2020 Jan 17;19(3):2272–80. doi: 10.3892/ol.2020.11313 (PMC7039154; doi:10.3892/ol.2020.11313), 2020-01-17
Supplement: Supplementary_Data.pdf [file Supplementary_Data.pdf]

Table SI. MARCKS like 1 mRNA levels were increased in lung adenocarcinoma tissues compared with normal lungs in published datasets downloaded from the *Oncomine* database.

| Author, year                 | Fold change<br>(lung adenocarcinoma vs. normal lung) | P-value                | Number of samples<br>(lung adenocarcinoma; normal lung) | (Refs.) |
|------------------------------|------------------------------------------------------|------------------------|---------------------------------------------------------|---------|
| Selamat <i>et al</i> , 2012  | 2.23                                                 | $8.69 \times 10^{-11}$ | 27; 30                                                  | (28)    |
| Chen <i>et al</i> , 2014     | 2.93                                                 | $2.63 \times 10^{-23}$ | 58; 58                                                  | (33)    |
| Su <i>et al</i> , 2007       | 2.71                                                 | $9.00 \times 10^{-16}$ | 45; 65                                                  | (29)    |
| Hou <i>et al</i> , 2010      | 2.64                                                 | $3.42 \times 10^{-8}$  | 20; 19                                                  | (30)    |
| Stearman <i>et al</i> , 2005 | 2.07                                                 | $7.48 \times 10^{-19}$ | 58; 49                                                  | (31)    |
| Landi <i>et al</i> , 2008    | 1.60                                                 | $2.21 \times 10^{-6}$  | 226; 20                                                 | (32)    |

Table SII. Clinical data of patients from whom the tissue samples were obtained. The clinical staging of lung tumors was based on a published classification (69).

| Patient number | Age, years | Sex    | Tumor stage | TNM stage  | Treatment                     |
|----------------|------------|--------|-------------|------------|-------------------------------|
| 1              | 49         | Female | IV          | T1, N3, M1 | Chemotherapy                  |
| 2              | 50         | Male   | IB          | T2, N0, M0 | Surgery                       |
| 3              | 37         | Male   | IV          | T4, N3, M1 | Chemotherapy                  |
| 4              | 39         | Female | IV          | T2, N3, M1 | Chemotherapy                  |
| 5              | 47         | Female | IIIA        | T4, N1, M0 | Chemotherapy and radiotherapy |

The normal lung sample was from a 42-year-old male. T, tumor; N, node; M, metastasis.
